# Supplementary material for: Preference, Expected Burden, and Willingness to Use Digital and Traditional Methods to Assess Food and Alcohol Intake
Source: MDPI journal article supplement (doi:10.3390/nu13103340), 2021-09-24
Supplement: s1 [file s1]

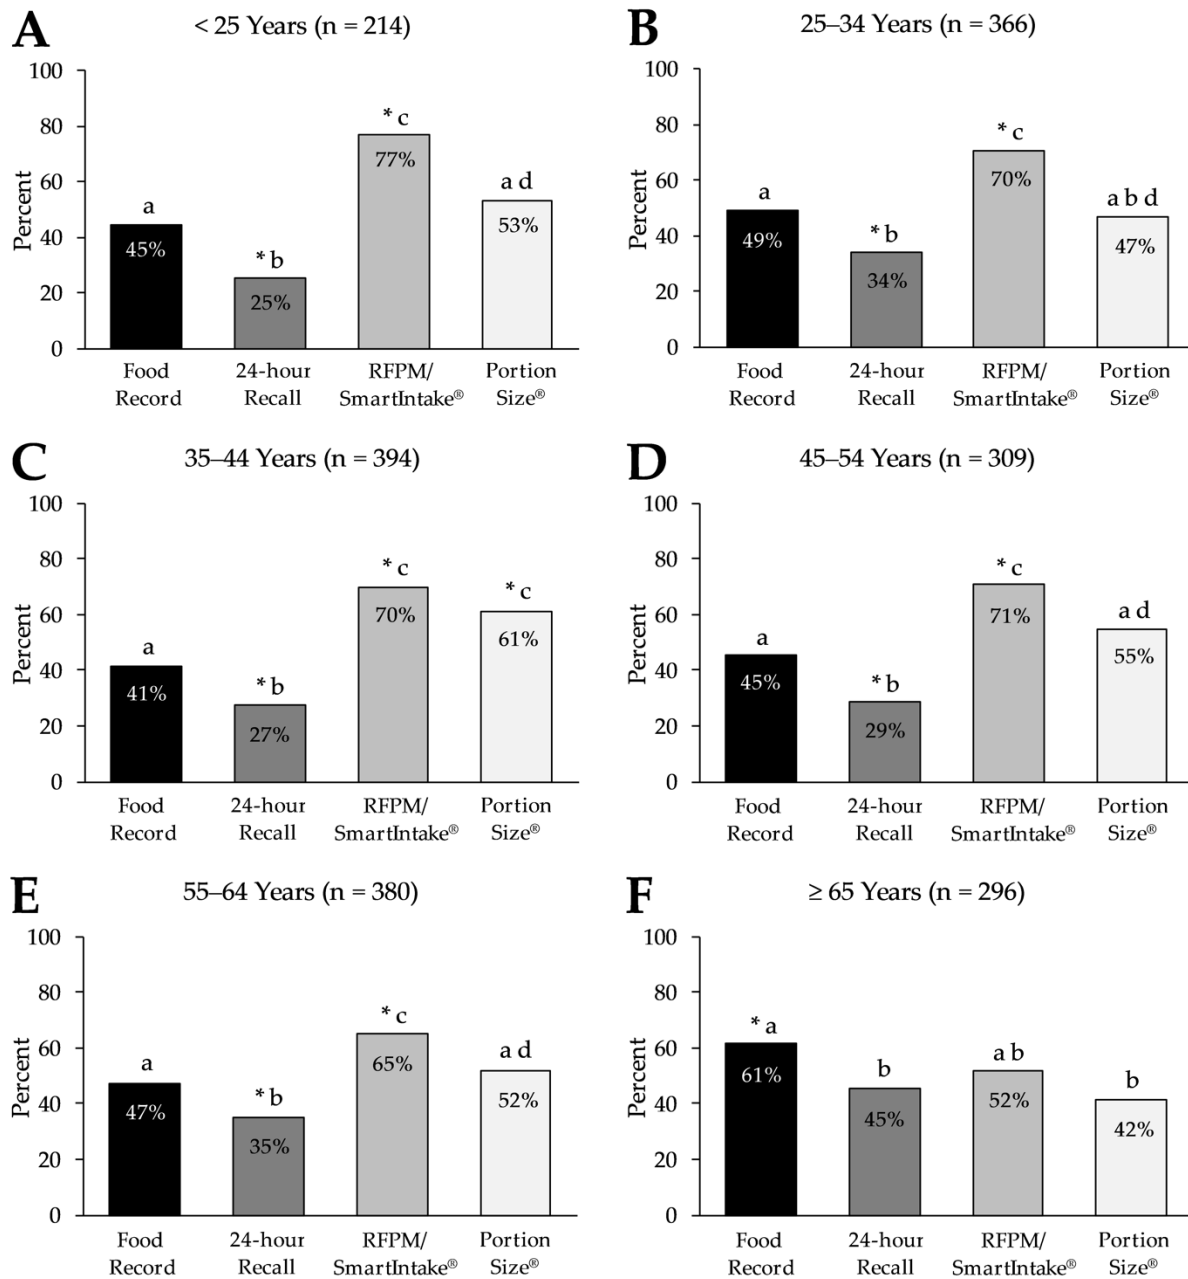

**Supplementary Figure 1.** Percentage of participants who rated each method as their preferred method of food intake assessment in those <25 years (Panel A), 25–34 years (Panel B), 35–44 years (Panel C), 45–54 years (Panel D), 55–64 years (Panel E), and ≥65 years of age (Panel F). \* Denotes a significant difference from 'not preferred' for the respective method ( $p < 0.001$ ) in the same panel. Letters (a–d) that differ from each other indicate differences between methods ( $p < 0.001$ ). RFPM Remote, Food Photography Method.
